# Supplementary material for: Rare and Common Variants Uncover the Role of the Atria in Coarctation of the Aorta
Source: MDPI journal article supplement (doi:10.3390/genes13040636), 2022-04-02
Supplement: s1 [file s1]

## Supplementary materials

Supplementary Figure S1. Bioinformatics pipeline

Supplementary Table S1. Rare *MYH6* damaging variants in Pittsburgh LVOTO subjects.

Supplementary Table S2. Significant excess of *MYH6* rare variants in CoA in Pittsburgh LVOTO subjects.

Supplementary Table S3. Summary of genetic evidence of *MYH6* to different LVOTO lesions.

Supplementary Table S4. Prevalence of *PCDHA* delCNV and *MYH6* damaging variants in Pittsburgh LVOTO subjects.

Supplementary Table S5. Analysis for co-occurrence of *PCDHA* delCNV and rare damaging *MYH6* variants.

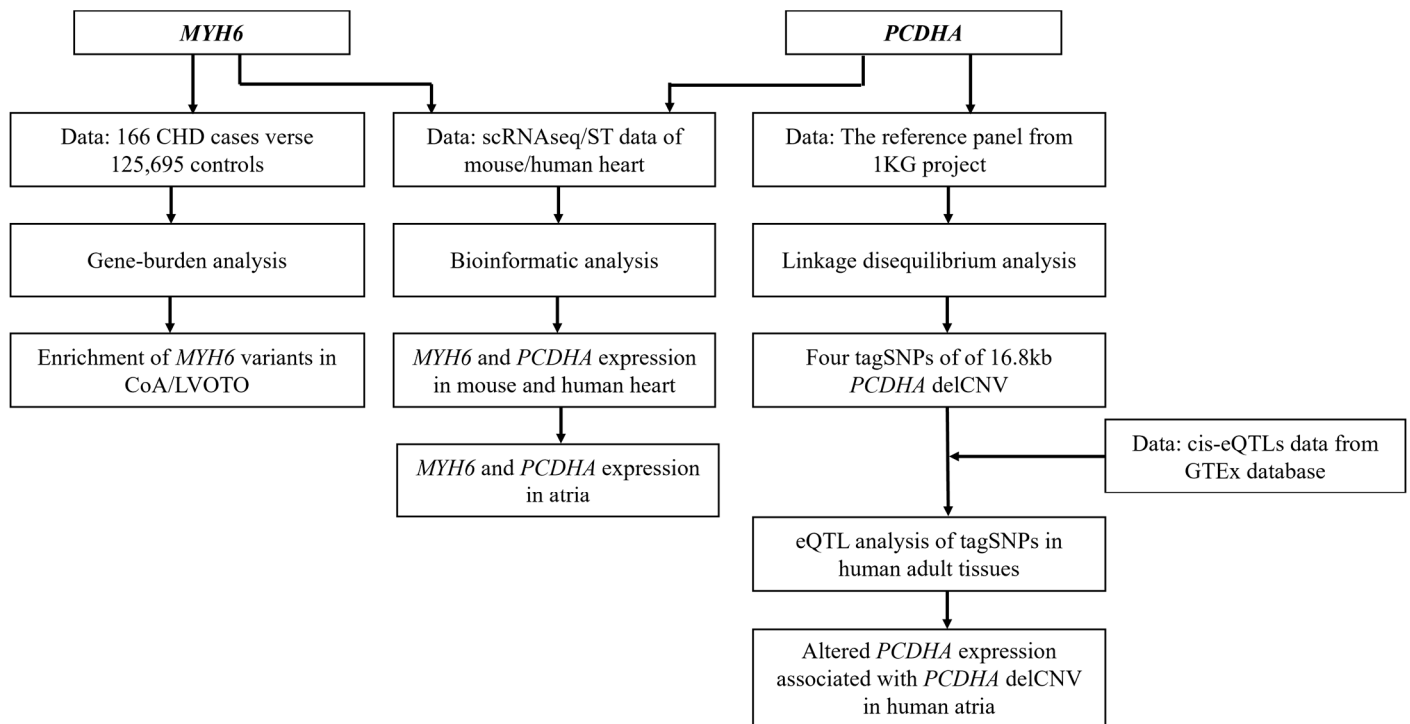

Supplementary Figure S1. Bioinformatics pipeline

scRNAseq: single cell RNA sequencing. ST: spatial transcriptomics. 1KG: 1000 genome project. eQTL: expression Quantitative Trait Loci. GTEx: The Genotype-Tissue Expression.

Supplementary Table S1. Rare *MYH6* damaging variants in Pittsburgh LVOTO subjects

| Sample ID | Sex | PCDHA delCNV | Chr:Position | MYH6 variants |      |             |              |          |      |          | CHD Phenotype                    |                         |     |     |      |                                                |                    |
|-----------|-----|--------------|--------------|---------------|------|-------------|--------------|----------|------|----------|----------------------------------|-------------------------|-----|-----|------|------------------------------------------------|--------------------|
|           |     |              |              | Ref           | Alt  | dbSNP150    | Allele Depth | Genotype | CADD | MAF      | Variant                          | Variant Classification  | BAV | CoA | HLHS | Aortic arch hypoplasia/Interrupted aortic arch | Phenotype Category |
| 7009      | M   | +/-Δ16kb     | 14:23868213  | A             | ACTC | --          | 83,68        | 0/1      | --   | --       | c.1614_1615insGAG:p.C539delinsEC | nonframeshift insertion |     | ✓   |      | ✓                                              | Isolated_CoA       |
| 7010      | F   | +/+          | 14:23863081  | C             | T    | rs758061689 | 83,84        | 0/1      | 26.5 | 3.18E-05 | c.G2722A:p.D908N                 | missense                |     | ✓   |      |                                                | Complex_CoA        |
| 7164      | M   | +/+          | 14:23863081  | C             | T    | rs758061689 | 95,93        | 0/1      | 26.5 | 3.18E-05 | c.G2722A:p.D908N                 | missense                | ✓   |     |      |                                                | Isolated_BAV       |
| 7289      | M   | +/-Δ16kb     | 14:23858207  | G             | A    | rs372736126 | 6,5          | 0/1      | 34   | 1.60E-05 | c.C4036T:p.R1346W                | missense                |     |     | ✓    |                                                | HLHS               |
| 7340      | M   | +/+          | 14:23866178  | C             | T    | rs770907731 | 30,21        | 0/1      | 26.8 | .        | c.G2162A:p.R721Q*                | missense                | ✓   | ✓   |      |                                                | BAV/CoA            |
| 7340      | M   | +/+          | 14:23854157  | C             | T    | rs142437308 | 10,27        | 0/1      | 25   | 3.98E-06 | c.G5257A:p.A1753T                | missense                | ✓   | ✓   |      |                                                | BAV/CoA            |
| 7494      | M   | +/+          | 14:23857395  | G             | T    | rs727503234 | 112,80       | 0/1      | 31   | 8.35E-05 | c.C4328A:p.A1443D                | missense                | ✓   | ✓   |      |                                                | BAV/CoA            |
| 7532      | M   | +/+          | 14:23855280  | C             | T    | rs534560839 | 57,58        | 0/1      | 25.1 | 0.0001   | c.G5020A:p.A1674T                | missense                |     |     | ✓    |                                                | HLHS               |
| 7537      | F   | +/+          | 14:23868075  | C             | T    | rs150415679 | 120,107      | 0/1      | 28.2 | 0.0001   | c.G1753A:p.G585S                 | missense                |     | ✓   |      | ✓                                              | Complex_CoA        |
| 7575      | F   | +/+          | 14:23871741  | A             | G    | --          | 57,52        | 0/1      | 23.1 | .        | c.T1073C:p.M358T                 | missense                | ✓   | ✓   |      |                                                | BAV/CoA            |
| 7711      | M   | +/+          | 14:23865584  | C             | T    | rs748960382 | 30,41        | 0/1      | 29   | 3.98E-06 | c.G2338A:p.D780N                 | missense                | ✓   | ✓   |      | ✓                                              | BAV/CoA            |

\*\*This amino acid substitution significantly associated with CoA in Iceland population (Bjornsson et al. 2018).

Minor allele frequency of these variants should be less than 0.0002 in GnomAD exome v2.1.1.

**Supplementary Table S2. Significant excess of *MYH6* rare variants in CoA within the Pittsburgh LVOTO**

|                          | <i>MYH6</i><br>carriers | non- <i>MYH6</i><br>carriers | Frequency % | <i>P</i> | OR (CI 95)        |
|--------------------------|-------------------------|------------------------------|-------------|----------|-------------------|
| non-CoA<br>LVOTO (n=111) | 3                       | 108                          | 2.7         | 0.01601  | 5.19 (1.13-32.44) |
| CoA (n=55)               | 7                       | 48                           | 12.7        |          |                   |

Fisher's exact test was used to estimate P value, odds ratio (OR) and 95% confidence interval (95%CI).

**Supplementary Table S3. Analysis of the association of *MYH6* variants to different LVOTO lesions**

**a. Using GnomAD Exome v2.1.1 as Reference Population**

| Cohort (sample size)                                       | No. of <i>MYH6</i> carriers | Frequency (%) | <i>P</i>        | OR (95%CI)                |
|------------------------------------------------------------|-----------------------------|---------------|-----------------|---------------------------|
| Reference population:<br>GnomAD exome v2.1.1,<br>n=125,695 | 975                         | 0.776         |                 |                           |
| *LVOTO (166)                                               | 10                          | 6.02          | <b>9.12e-07</b> | <b>8.20 (3.84-15.55)</b>  |
| Isolated BAV (37)                                          | 1                           | 2.78          |                 | ns                        |
| HLHS (58)                                                  | 2                           | 3.45          |                 | ns                        |
| non-CoA LVOTO (n=111)                                      | 3                           | 2.7           |                 | ns                        |
| *All CoA (55)                                              | 7                           | 12.73         | <b>2.54e-07</b> | <b>18.64 (7.10-41.59)</b> |
| *BAV/CoA (29)                                              | 4                           | 13.79         | <b>7.43e-05</b> | <b>20.47 (5.17-59.44)</b> |
| *Complex CoA (15)                                          | 2                           | 13.33         | <b>0.005924</b> | <b>19.67 (2.15-87.28)</b> |
| Isolated CoA (11)                                          | 1                           | 9.09          |                 | ns                        |

**b. Using GnomAD Exome v2.1.1 non-Finnish European as Control Reference Population**

| Cohort (sample size)                                                            | No. of <i>MYH6</i> carriers | Frequency (%) | <i>P</i>        | OR (95%CI)                |
|---------------------------------------------------------------------------------|-----------------------------|---------------|-----------------|---------------------------|
| Reference population:<br>GnomAD exome v2.1.1 non-<br>Finnish European, n=56,853 | 543                         | 0.955         |                 |                           |
| *LVOTO (166)                                                                    | 10                          | 6.02          | <b>5.85e-06</b> | <b>6.65 (3.11-12.64)</b>  |
| Isolated BAV (37)                                                               | 1                           | 2.78          |                 | ns                        |
| HLHS (58)                                                                       | 2                           | 3.45          |                 | ns                        |
| non-CoA LVOTO (n=111)                                                           | 3                           | 2.7           |                 | ns                        |
| *All CoA (55)                                                                   | 7                           | 12.73         | <b>1.03e-06</b> | <b>15.12 (5.75-33.81)</b> |
| *BAV/CoA (29)                                                                   | 4                           | 13.79         | <b>1.66e-04</b> | <b>16.59 (4.18-48.28)</b> |
| Complex CoA (15)                                                                | 2                           | 13.33         | 0.008863        | 15.95 (1.74-70.75)        |
| Isolated CoA (11)                                                               | 1                           | 9.09          |                 | ns                        |

Summary of *MYH6* rare variant frequency in LVOTO cohorts and reference population (GnomAD exome v2.1.1, all samples or non-Finnish European samples). Fisher's exact test was used to estimate *P* value, odds ratio (OR) and 95% confidence interval (95%CI) in analysis for excess *MYH6* rare variants in LVOTO cohort vs. reference population (ns=not significant if  $P > 0.05$ ). \*Statically significant Fisher's exact test ( $P < 0.00714$  correction for multiple testing threshold). All LVOTO subjects in this study are European population. Reference cohort is GnomAD exome v2.1.1.

**Supplementary Table S4. Prevalence of *PCDHA* delCNV and *MYH6* damaging variants in Pittsburgh LVOTO subjects**

| Phenotype    | No.<br>Subjects | <i>PCDHA</i><br><i>delCNV</i> only | <i>MYH6</i><br>only | <i>PCDHA</i><br><i>delCNV</i> and<br><i>MYH6</i> | TOTAL       |
|--------------|-----------------|------------------------------------|---------------------|--------------------------------------------------|-------------|
| All LVOTO    | 166             | 34 (20.48%)                        | 8 (4.82%)           | 2 (1.21%)                                        | 44 (26.5%)  |
| Isolated BAV | 37              | 8 (21.62%)                         | 1 (2.70%)           | 0 (0.00%)                                        | 9 (24.32%)  |
| Complex BAV  | 7               | 3 (42.86%)                         | 0 (0.00%)           | 0 (0.00%)                                        | 3 (42.86%)  |
| HLHS         | 58              | 9 (15.52%)                         | 1 (1.72%)           | 1 (1.72%)                                        | 11 (18.97%) |
| All CoA      | 55              | 11 (20.00%)                        | 6 (10.90%)          | 1 (1.82%)                                        | 18 (32.73%) |
| Isolated CoA | 11              | 4 (36.36%)                         | 0 (0.00%)           | 1 (9.09%)                                        | 5 (45.45%)  |
| Complex CoA  | 15              | 3 (20.00%)                         | 2 (13.33%)          | 0(0.00%)                                         | 5 (33.33%)  |
| BAV/CoA      | 29              | 4 (13.79%)                         | 4 (13.79%)          | 0 (0.00%)                                        | 8 (27.59%)  |

**Supplementary Table S5. Analysis for co-occurrence of *PCDHA* delCNV and rare damaging *MYH6* variants**

|                   | <i>MYH6</i> and <i>PCDHA</i> delCNV | <i>MYH6</i> or <i>PCDHA</i> delCNV | <i>P</i> -value |
|-------------------|-------------------------------------|------------------------------------|-----------------|
| LVOTO (n=44)      | 2 (4.3%)                            | 42 (95.7%)                         | 0.66            |
| Controls * (n=68) | 2 (2.9%)                            | 66 (97.1%)                         |                 |

Due to higher variant load in LVOTO patients, the analysis was limited to only individuals with at least one allele of *MYH6* or *PCDHA* delCNV. Individuals with neither variant were excluded.

Fisher's exact test was used to estimate *P* value.

\*Controls are from 1KG Non-Finnish European population.
